# Supplementary material for: Response of plant diversity and soil physicochemical properties to different gap sizes in a Pinus massoniana plantation
Source: PeerJ. 2021 Sep 21;9:e12222. doi: 10.7717/peerj.12222 (PMC8462388; doi:10.7717/peerj.12222)
Supplement: Supplemental Information 1 [file peerj-09-12222-s001.xlsx]

## Sheet: 0-10cm soil
Treatment	pH	SOM(mg/kg)	AP(mg/kg)	AN(mg/kg)	AK(mg/kg)	SW(%)	BD(g/cm3 )
CK	4.08	30.236	6.60743	371.326	99.043	33.555	1.96
CK	4.09	29.6918	5.77769	362.366	100.728	34.0264	1.9
CK	4.04	29.187	8.24971	363.441	101.983	32.7372	2.07
SG	4.1	26.0904	4.4031	191.792	85.5664	27.2593	1.74
SG	4.05	27.5089	5.39745	180.645	84.4442	29.0075	1.98
SG	4.15	28.621	9.35547	176.165	83.664	27.2078	1.89
MG	4.09	60.9893	5.50058	606.093	80.774	34.8199	1.44
MG	4.21	51.011	3.85048	651.254	75.664	41.1773	1.38
MG	4.08	48.9569	7.98526	662.366	78.654	40.5008	1.41
LG	4.07	45.9939	7.43172	330.659	75.541	29.2119	1.81
LG	4.06	50.5222	4.40134	435.842	74.6308	30.3546	1.8
LG	4.08	56.1643	5.5052	362.975	73.7207	27.8734	1.82
SG stands for small gaps. MG stands for medium gaps. LG stands for large gaps.

## Sheet: 10-20cm soil
Treatment	pH	SOM(mg/kg)	AP(mg/kg)	AN(mg/kg)	AK(mg/kg)	SW(%)	BD(g/cm3 )
CK	4.06	30.323	5.78034	332.975	98.9393	33.1708	2.02
CK	4.04	25.1977	5.78254	321.147	97.9929	32.2375	2.01
CK	4.15	26.2145	4.95409	300.654	93.292	33.2628	1.89
SG	4.09	24.7758	3.30035	282.796	79.828	27.784	1.91
SG	4.19	27.1883	4.40442	220.301	78.762	29.8415	1.9
SG	4.21	25.1411	7.70358	290.538	78.727	27.7919	1.87
MG	4.17	37.9628	8.25318	439.699	80.837	30.7247	1.49
MG	4.16	43.415	8.7946	403.226	82.839	30.62	1.43
MG	4.07	48.6315	7.14847	541.935	81.834	28.6823	1.43
LG	4.12	51.2265	7.16091	441.935	76.4628	25.351	1.9
LG	4.13	52.7369	7.98605	439.699	75.1202	26.8266	1.87
LG	4.17	52.2163	5.22691	441.577	73.7775	24.584	1.86
SG stands for small gaps. MG stands for medium gaps. LG stands for large gaps.

## Sheet: plant diversity
Treatment	Simpson1	Shannon-Wiener1	Pielou1	Simpson2	Shannon-Wiener2	Pielou2
CK	0.769958	0.943006	0.713199	0.942817	0.765079	0.983201
CK	0.77544	0.93553	0.70775	0.93321	0.763829	0.97782
CK	0.753332	0.95322	0.72455	0.952333	0.762992	0.99626
SG	0.929609	1.26201	0.872061	0.88322	0.95892	0.802829
SG	0.90663	1.22663	0.89777	0.865748	0.974712	0.792159
SG	0.94532	1.30875	0.85336	0.842719	0.997283	0.789289
MG	0.946868	1.40194	0.907952	0.919946	1.17203	0.900849
MG	0.9138	1.38664	0.90646	0.912302	1.19737	0.902929
MG	0.9754	1.42567	0.90846	0.9134	1.15389	0.901727
LG	0.873585	1.14353	0.781956	0.839424	0.894847	0.85928
LG	0.88996	1.15432	0.797557	0.821032	0.90273	0.872929
LG	0.86885	1.13985	0.803566	0.842022	0.889032	0.83201
H1: The Shannon-Wiener index of the shrub layer, H2: The Shannon-Wiener index of the herb layer, D1: The simpson index of the shrub layer, D2: The Simpson index of the herb layer, J1: The Pielou index of the shrub layer, J2: The Pielou index of the herb layer
SG stands for small gaps. MG stands for medium gaps. LG stands for large gaps.

## Sheet: abundance of plants
Treatments	1	2	3	4	5	6	7	8	9	10	11	12	13	14	15	16	17	18	19	20	21	22	23	24	25	26	27	28	29	30	31	32	33	34	35	36	37	38	39	40	41	42	43	44	45	46	47	48	49
Species	Cinnamomum camphora	Aralia chinensis	Urena lobata Linn.	Quercus serrata	Rubus pirifolius	Cryptomeria fortunei	Myrsine africana	Smilax china	Rubus lambertianus	Rubus chroosepalus	Eurya japonica	Ficus pandurata	Clematis finetiana	Litsea pungens	Rubus buergeri	Viburnum dilatatum Thunb.	Camellia sinensis	Ardisia pusilla	Mallotus barbatus	Eurya loquaiana	Xylosma racemosum	Ficus stenophylla	Smilax arisanensis	Maesa perlarius	Pericampylus glaucus	Melastoma normale	Ampelopsis delavayana	Smilax glabra	Smilax discotis	Euscaphis japonica	Smilax ferox	Ardisia japonica	Serissa japonica	Viburnum utile	Rhus chinensis	Rosa cymosa	Smilax microphylla	Rubus corchorifolius	Parthenocissus laetevirens	Melodinus hemsleyanus	Trachelospermum jasminoides	Symplocos lancifolia	Hedera nepalensis	Castanea mollissima	Ficus heteromorpha	Sabia swinhoei	Actinidia rubricaulis	Oreocnide frutescens	Vitex negundo
CK	10.1695	2.82486	7.34463	3.38983	2.82486	3.38983	2.82486	0.564972	1.69492	1.12994	0	0	0	0	0	1.12994	1.69492	45.1977	1.69492	4.51977	3.38983	0.564972	0.564972	2.25989	1.12994	1.69492	0	0	0	0	0	0	0	0	0	0	0	0	0	0	0	0	0	0	0	0	0	0	0
CK	11.1695	3.82486	8.34463	4.38983	3.82486	4.38983	3.82486	1.56497	2.69492	2.12994	0	0	0	0	0	2.12994	2.19492	46.1977	2.19492	5.51977	3.88983	1.56497	1.06497	3.25989	1.62994	2.69492	0	0	0	0	0	0	0	0	0	0	0	0	0	0	0	0	0	0	0	0	0	0	0
CK	9.16949	1.82486	6.34463	2.38983	1.82486	2.38983	1.82486	-0.435028	0.694915	0.129944	0	0	0	0	0	0.129944	1.19492	44.1977	1.19492	3.51977	2.88983	-0.435028	0.0649718	1.25989	0.629944	0.694915	0	0	0	0	0	0	0	0	0	0	0	0	0	0	0	0	0	0	0	0	0	0	0
SG	15.1007	8.05369	13.4228	4.02685	4.36242	3.02013	0	4.69799	2.01342	4.69799	3.02013	1.34228	3.02013	2.01342	6.71141	0	0	0	0	1.34228	0	0	0	0	1.67785	3.02013	0.33557	0.33557	3.02013	1.00671	1.27	5.7047	1.34228	0	0	0	0	0	0	0	0	0	0	0	0	0	0	0	0.671141
SG	14.1007	7.05369	12.4228	3.02685	3.36242	2.02013	0	3.69799	1.01342	3.69799	2.02013	0.342282	2.02013	1.01342	5.71141	0	0	0	0	1.54228	0	0	0	0	2.17785	3.52013	0.83557	0.83557	3.52013	1.50671	1.77	6.2047	1.84228	0	0	0	0	0	0	0	0	0	0	0	0	0	0	0	1.07114
SG	16.1007	9.05369	14.4228	5.02685	5.36242	4.02013	0	5.69799	3.01342	5.69799	4.02013	2.34228	4.02013	3.01342	7.71141	0	0	0	0	1.14228	0	0	0	0	1.67785	3.02013	0.33557	0.33557	3.02013	1.00671	1.27	5.7047	1.34228	0	0	0	0	0	0	0	0	0	0	0	0	0	0	0	0.171141
MG	8.87574	5.6213	7.98817	5.02959	1.47929	1.18343	3.25444	1.47929	0	1.77515	2.36686	2.36686	1.18343	2.36686	3.5503	0	0	0	4.73373	3.25444	0	0.887574	0	0	0	2.95858	1.47929	0	0	0	0	13.3136	0	2.07101	0.591716	0.591716	4.43787	2.36686	2.36686	0.887574	0.591716	1.77515	1.47929	0.887574	0	0	0.887574	3.5503	1.47929
MG	9.37574	6.1213	8.48817	5.52959	1.97929	1.68343	3.75444	1.97929	0	2.27515	2.86686	2.86686	1.68343	2.86686	4.0503	0	0	0	4.23373	2.75444	0	0.787574	0	0	0	3.95858	2.47929	0	0	0	0	12.3136	0	1.97101	0.491716	0.491716	4.33787	2.26686	2.26686	0.787574	0.491716	1.67515	1.37929	0.787574	0	0	0.787574	3.4503	1.37929
MG	8.37574	5.1213	7.48817	4.52959	0.97929	0.683432	2.75444	0.97929	0	1.27515	1.86686	1.86686	0.683432	1.86686	3.0503	0	0	0	5.23373	3.75444	0	0.987574	0	0	0	1.95858	0.47929	0	0	0	0	14.3136	0	2.17101	0.691716	0.691716	4.53787	2.46686	2.46686	0.987574	0.691716	1.87515	1.57929	0.987574	0	0	0.987574	3.6503	1.57929
LG	10.2564	9.40171	2.5641	0.854701	4.70085	0	6.83761	3.4188	0.52735	0	2.13675	2.5641	2.13675	1.7094	6.41026	0.854701	0	29.9145	0	0	0	0.42735	0.42735	0	0	0	1.7094	0	0.42735	1.28205	0.42735	0	0	0	0.42735	1.7094	0	0.854701	0.42735	0	0	0	0	0	1.28205	2.5641	0	0	2.99145
LG	10.7564	9.90171	3.0641	1.3547	5.20085	0	7.33761	3.9188	1.02735	0	2.63675	3.0641	2.63675	2.2094	6.91026	1.3547	0	28.9145	0	0	0	0.32735	0.32735	0	0	0	1.2094	0	0.32735	1.18205	0.32735	0	0	0	0.52735	1.8094	0	0.954701	0.52735	0	0	0	0	0	0.782051	2.0641	0	0	2.49145
LG	9.75641	8.90171	2.0641	0.354701	4.20085	0	6.33761	2.9188	0.0273504	0	1.63675	2.0641	1.63675	1.2094	5.91026	0.354701	0	30.9145	0	0	0	0.52735	0.52735	0	0	0	2.2094	0	0.52735	1.38205	0.52735	0	0	0	0.32735	1.6094	0	0.754701	0.32735	0	0	0	0	0	1.78205	3.0641	0	0	3.49145
SG stands for small gaps. MG stands for medium gaps. LG stands for large gaps.
[truncated: 32 more columns]

## Sheet: figure2 of raw datas
Treatment	Richness1	Richness2
CK	21	6
CK	21.267	6.12232
CK	21.1345	6.12443
SG	28	17.0985
SG	28.4574	17
SG	27.9678	17.0904
MG	35	20
MG	35.0864	20.1133
MG	35.0187	0.10303
LG	29	11
LG	29.0754	11.0838
LG	29.1357	11.0004
R1: The richness index of the shrub layer, R2: The richness index of the herb layer,

## Sheet: table2 of raw datas
Serial number	Species	Relative density	Relative frequency	Relative coverage	Relative density	Relative frequency	Relative coverage	Relative density	Relative frequency	Relative coverage	Relative density	Relative frequency	Relative coverage
		CK			SG			MG			LG
1	Cinnamomum camphora	10.1695	8.57143	26.3994	15.5709	3.44828	42.0181	8.87574	5.17241	15.0677	10.2564	7.01754	22.7674
2	Aralia chinensis	2.82486	8.57143	9.67519	8.3045	5.17241	28.0882	5.6213	5.17241	7.80317	9.40171	7.01754	53.3857
3	Urena lobata Linn.	7.34463	8.57143	7.04907	13.8408	3.44828	5.48062	7.98817	5.17241	17.2951	2.5641	3.50877	1.02061
4	Quercus serrata	3.38983	5.71429	2.17692	4.15225	3.44828	3.08285	5.02959	3.44828	3.82152	0.854701	1.75439	0.47105
5	Rubus pirifolius	2.82486	5.71429	0.967519	4.49827	3.44828	2.46628	1.47929	1.72414	0.545931	4.70085	7.01754	6.00589
6	Cryptomeria fortunei	3.38983	5.71429	23.6351	3.02013	3.44828	0.251195	1.18343	1.72414	0.698792
7	Myrsine africana	2.82486	2.85714	2.07326				3.25444	3.44828	2.62047	6.83761	5.26316	1.02061
8	Smilax china	0.564972	2.85714	0.0172771	4.84429	5.17241	0.159851	1.47929	1.72414	0.218372	3.4188	5.26316	0.902846
9	Rubus lambertianus	1.69492	2.85714	0.414651	2.07612	3.44828	0.102762				0.42735	1.75439	0.0392542
10	Rubus chroosepalus	1.12994	2.85714	0.0345543	4.84429	5.17241	0.131306	1.77515	1.72414	0.87349
11	Eurya japonica	0	0	0	3.11419	3.44828	0.251195	2.36686	3.44828	0.55321	2.13675	3.50877	0.314033
12	Ficus pandurata	0	0	0	1.38408	3.44828	0.137015	2.36686	1.72414	2.44577	2.5641	3.50877	0.235525
13	Clematis finetiana	0	0	0	3.11419	3.44828	0.205523	1.18343	1.72414	0.174698	2.13675	1.75439	0.785083
14	Litsea pungens	0	0	0	2.07612	3.44828	0.867764	2.36686	1.72414	0.698792	1.7094	3.50877	2.70854
15	Rubus buergeri	0	0	0	6.92042	5.17241	0.228359	3.5503	5.17241	0.55321	6.41026	7.01754	0.431796
16	Viburnum dilatatum Thunb.	1.12994	2.85714	0.276434	0	0	0	0	0	0	0.854701	1.75439	0.235525
17	Camellia sinensis	1.69492	2.85714	0.932965	0	0	0	0	0	0	0	0	0
18	Ardisia pusilla	45.1977	5.71429	13.8217	0	0	0	0	0	0	29.9145	7.01754	3.82728
19	Mallotus barbatus	1.69492	2.85714	8.29302	0	0	0	4.73373	3.44828	19.7991	0	0	0
20	Eurya loquaiana	4.51977	5.71429	1.14029	1.38408	1.72414	0.274031	3.25444	3.44828	0.480419	0	0	0
21	Xylosma racemosum	3.38983	5.71429	1.86593	0	0	0	0	0	0	0	0	0
22	Ficus stenophylla	0.564972	2.85714	0.414651	0	0	0	0.887574	1.72414	0.262047	0.42735	1.75439	0.0785083
23	Smilax arisanensis	0.564972	2.85714	0.0345543	0	0	0	0	0	0	0.42735	1.75439	0.157017
24	Maesa perlarius	2.25989	2.85714	0.552868	0	0	0	0	0	0	0	0	0
25	Pericampylus glaucus	1.12994	5.71429	0.155494	1.7301	6.89655	0.105045	0	0	0	0	0	0
26	Melastoma normale	1.69492	5.71429	0.0691085	3.11419	8.62069	0.205523	2.95858	5.17241	0.997234	0	0	0
27	Ampelopsis delavayana	0	0	0	0.346021	1.72414	0.548062	1.47929	3.44828	0.371233	1.7094	3.50877	0.157017
28	Smilax glabra	0	0	0	0.346021	1.72414	0.0342538	0	0	0	0	0	0
29	Smilax discotis	0	0	0	3.11419	3.44828	0.0164418	0	0	0	0.42735	1.75439	0.47105
30	Euscaphis japonica	0	0	0	1.03806	1.72414	0.411046	0	0	0	1.28205	3.50877	1.25613
31	Smilax ferox	0	0	0	1.7301	1.72414	0.342538	0	0	0	0	0	0
32	Ardisia japonica	0	0	0	5.88235	5.17241	0.776421	13.3136	6.89655	1.38303	0	0	0
33	Serissa japonica	0	0	0	1.38408	3.44828	0.0228359	0	0	0	0	0	0
34	Viburnum utile	0	0	0	0	0	0	2.07101	3.44828	1.4267	0	0	0
35	Rhus chinensis	0	0	0	0	0	0	0.591716	1.72414	0.349396	0.42735	1.75439	0.588813
36	Rosa cymosa	0	0	0	0	0	0	0.591716	1.72414	0.0582326	1.7094	1.75439	0.157017
37	Smilax microphylla	0	0	0	0	0	0	4.43787	5.17241	1.09186
38	Rubus corchorifolius	0	0	0	0	0	0	2.36686	1.72414	0.931722	0.854701	3.50877	0.883219
39	Parthenocissus laetevirens	0	0	0	0	0	0	2.36686	1.72414	0.232931	0.42735	1.75439	0.176644
40	Melodinus hemsleyanus	0	0	0	0	0	0	0.887574	1.72414	0.087349	0	0	0
41	Trachelospermum jasminoides	0	0	0	0	0	0	0.591716	1.72414	0.116465	0	0	0
42	Symplocos lancifolia	0	0	0	0	0	0	1.77515	1.72414	0.524094	0	0	0
43	Hedera nepalensis	0	0	0	0	0	0	1.47929	1.72414	0.218372	0	0	0
44	Castanea mollissima	0	0	0	0	0	0	0.887574	1.72414	0.131023	0	0	0
45	Ficus heteromorpha	0	0	0	0	0	0	0	0	0	1.28205	1.75439	0.176644
46	Sabia swinhoei	0	0	0	0	0	0	0	0	0	2.5641	1.75439	0.706575
47	Actinidia rubricaulis	0	0	0	0	0	0	0.887574	3.44828	0.232931	0	0	0
48	Oreocnide frutescens	0	0	0	0	0	0	3.5503	1.72414	12.5783	0	0	0
49	Vitex negundo	0	0	0	0.692042	1.72414	1.09612	1.47929	1.72414	5.09536	2.99145	3.50877	0.824338
50	Acanthopanax trifoliatus	0	0	0	0.346021	1.72414	0.137015	0.887574	1.72414	0.262047	0.854701	3.50877	0.0588813
51	Rubus innominatus	0	0	0	0.346021	1.72414	0.0913436	0	0	0	0	0	0
52	Paulownia fortunei	0	0	0	2.76817	3.44828	12.4684	0	0	0	0	0	0

## Sheet: table3 of raw datas 
Serial number	Species	Relative density	Relative frequency	Relative coverage	Relative density	Relative frequency	Relative coverage	Relative density	Relative frequency	Relative coverage	Relative density	Relative frequency	Relative coverage
		CK			SG			MG			LG
53	Parathelypteris glanduligera	17.3913	11.7647	6.75676	3.61991	7.31707	2.42718	2.99625	6.38298	1.70068	2.47934	2.27273	0.938967
54	Pteridium aquilinum	17.3913	23.5294	22.973	21.267	9.7561	17.4757	7.86517	6.38298	8.84354	6.61157	9.09091	8.92019
55	Miscanthus sinensis	17.3913	17.6471	13.5135	6.78733	9.7561	5.82524	3.37079	4.25532	2.72109	12.3967	11.3636	8.4507
56	Stenoloma chusanum	10.8696	11.7647	bv bv bv bv bv bv bv bv bv bv bv bv bv bv bv bv bv bv bv bv bv bv bv bv bv bv bv bv bv bv bv bv bv	4.97738	4.87805	6.79612	0	0	0	0	0	0
57	Arachniodes simplicior	13.0435	17.6471	8.10811	0	0	0	0	0	0	12.3967	11.3636	11.7371
58	Setaria plicata	23.913	17.6471	37.8378	22.6244	14.6341	25.2427	12.7341	10.6383	13.6054	12.3967	15.9091	18.3099
59	Blumea megacephala	0	0	0	1.35747	2.43902	2.91262	1.1236	2.12766	2.04082	0	0	0
60	Arthraxon hispidus	0	0	0	9.04977	7.31707	6.79612	0	0	0	9.91736	11.3636	6.10329
61	Oplismenus compositus	0	0	0	1.80995	2.43902	1.94175	8.61423	10.6383	8.16327	0.826446	2.27273	0.469484
62	Eragrostis ferruginea	0	0	0	1.35747	4.87805	2.91262	0.374532	2.12766	0.680272	0	0	0
63	Oxalis corniculata	0	0	0	13.1222	7.31707	6.79612	6.36704	6.38298	3.40136	0	0	0
64	Arachniodes chinensis	0	0	0	2.71493	7.31707	2.42718	2.24719	6.38298	1.70068	4.95868	6.81818	2.34742
65	Dryopteris fuscipes	0	0	0	4.0724	4.87805	1.94175	3.37079	4.25532	1.36054	30.5785	20.4545	40.3756
66	Synotis nagensium	0	0	0	1.80995	4.87805	1.94175	0	0	0	5.78512	4.54545	1.40845
67	Woodwardia japonica	0	0	0	0	0	0	7.49064	6.38298	6.80272	0	0	0
68	Solanum xanthocarpum	0	0	0	1.80995	2.43902	1.94175	0	0	0	0	0	0
69	Centella asiatica	0	0	0	0.452489	2.43902	0.970874	0	0	0	0	0	0
70	Artemisia princeps	0	0	0	0.904977	2.43902	6.79612	0	0	0	0	0	0
71	Cyperus rotundus	0	0	0	2.26244	4.87805	4.85437	0	0	0	0	0	0
72	Leptochloa chinensis	0	0	0	0	0	0	0	0	0	1.65289	4.54545	0.938967
73	Polygonum posumbu	0	0	0	0	0	0	2.99625	2.12766	1.36054	0	0	0
74	Lophatherum gracile	0	0	0	0	0	0	11.236	8.51064	11.5646	0	0	0
75	Microlepia hancei	0	0	0	0	0	0	13.1086	6.38298	10.8844	0	0	0
76	Dicranopteris dichotoma	0	0	0	0	0	0	3.74532	4.25532	6.80272	0	0	0
77	Gonostegia hirta	0	0	0	0	0	0	2.99625	4.25532	2.04082	0	0	0
78	Liriope spicata	0	0	0	0	0	0	0.374532	2.12766	0.680272	0	0	0
79	Commelina communis	0	0	0	0	0	0	1.49813	2.12766	1.36054	0	0	0
80	Iris tectorum	0	0	0	0	0	0	1.87266	2.12766	3.40136	0	0	0
81	Aster tataricus	0	0	0	0	0	0	5.61798	4.25532	10.8844	0	0	0
